# Supplementary material for: Estimation of time-varying reproduction numbers underlying epidemiological processes: A new statistical tool for the COVID-19 pandemic
Source: PubMed Central journal article supplement (PMC7373269; doi:10.1371/journal.pone.0236464), 2020-07-21
Supplement: pone.0236464.s001.pdf [file pone.0236464.s001.pdf]

## Appendix: Details of Optimization

To minimize (10), we differentiate  $\ell(\beta, \gamma)$  with respect to  $(\beta, \gamma)$ . Then  $(\hat{\beta}, \hat{\gamma})$  solves the following estimating equations:

$$\begin{aligned} \sum_{t=1}^T \left[ \left\{ \frac{z_R(t)}{r(t)} - 1 \right\} \frac{\partial r(t)}{\partial \beta} + \left\{ \frac{z_I(t)}{i(t)} - 1 \right\} \frac{\partial i(t)}{\partial \beta} \right] &= 0, \\ \sum_{t=1}^T \left[ \left\{ \frac{z_R(t)}{r(t)} - 1 \right\} \frac{\partial r(t)}{\partial \gamma} + \left\{ \frac{z_I(t)}{i(t)} - 1 \right\} \frac{\partial i(t)}{\partial \gamma} \right] &= 0, \end{aligned}$$

where the involved partial derivatives can be computed recursively. Specifically, taking partial derivatives on the both sides of (7) yields that, for  $t = 0, \dots, T-1$ ,

$$\begin{aligned} \frac{\partial i(t+1)}{\partial \beta} &= [\{\beta(t) + 1\}\{1 - \gamma(t)\} - 2\beta(t)i(t)] \frac{\partial i(t)}{\partial \beta} + i(t)\{1 - \gamma(t) - i(t)\} \frac{\partial \beta(t)}{\partial \beta}, \\ \frac{\partial i(t+1)}{\partial \gamma} &= [\{\beta(t) + 1\}\{1 - \gamma(t)\} - 2\beta(t)i(t)] \frac{\partial i(t)}{\partial \gamma} - i(t)\{\beta(t) + 1\} \frac{\partial \gamma(t)}{\partial \gamma}, \\ \frac{\partial r(t+1)}{\partial \beta} &= \frac{\partial r(t)}{\partial \beta} + \gamma(t) \frac{\partial i(t)}{\partial \beta}, \\ \frac{\partial r(t+1)}{\partial \gamma} &= \frac{\partial r(t)}{\partial \gamma} + \gamma(t) \frac{\partial i(t)}{\partial \gamma} + i(t) \frac{\partial \gamma(t)}{\partial \gamma}. \end{aligned}$$

Here,  $\frac{\partial}{\partial \beta} \beta(t) = \beta(t) \times \mathbf{B}(t)$ , and  $\frac{\partial}{\partial \gamma} \gamma(t) = \gamma(t) \times \mathbf{B}(t)$ , and  $\frac{\partial}{\partial \beta} i(0) = \frac{\partial}{\partial \gamma} i(0) = \frac{\partial}{\partial \beta} r(0) = \frac{\partial}{\partial \gamma} r(0) = 0$  by using the initial conditions.
